# Supplementary material
Source: ML conference proceedings conference paper supplement (https://proceedings.mlr.press/v84/eisen18a.html)
Supplement: Supplementary file [file eisen18a-supp.pdf]

## 8 Supplementary Material

### 8.1 Proof of Lemma 4

We factorize and bound  $\|\hat{\mathbf{H}}_{n,k}^{-1}\nabla R_n(\mathbf{x}_m) - \mathbf{H}_n^{-1}\nabla R_n(\mathbf{x}_m)\|$  as

$$\|\hat{\mathbf{H}}_{n,k}^{-1}\nabla R_n(\mathbf{x}_m) - \mathbf{H}_n^{-1}\nabla R_n(\mathbf{x}_m)\| \leq \|\mathbf{I} - \hat{\mathbf{H}}_{n,k}^{-1}\mathbf{H}_n\| \|\mathbf{H}_n^{-1}\nabla R_n(\mathbf{x}_m)\|. \quad (21)$$

Thus, it remains to bound  $\|\mathbf{I} - \hat{\mathbf{H}}_{n,k}^{-1}\mathbf{H}_n\|$  by some  $\epsilon_n$ . To do so, consider that we can factorize  $\mathbf{H}_n = \mathbf{U}(\boldsymbol{\Sigma} + cV_n\mathbf{I})\mathbf{U}^T$  and  $\hat{\mathbf{H}}_n^{-1}$  as in (8). We can then expand  $\|\mathbf{I} - \hat{\mathbf{H}}_{n,k}^{-1}\mathbf{H}_n\|$  as

$$\|\mathbf{I} - \hat{\mathbf{H}}_{n,k}^{-1}\mathbf{H}_n\| = \|\mathbf{I} - \mathbf{U}[(\hat{\boldsymbol{\Sigma}}_k + cV_n\mathbf{I})^{-1} \times (\boldsymbol{\Sigma} + cV_n\mathbf{I})]\mathbf{U}^T\| \quad (22)$$

where  $\hat{\boldsymbol{\Sigma}}_k \in \mathbb{R}^{p \times p}$  is the truncated eigenvalue matrix  $\boldsymbol{\Sigma}_k$  with zeros padded for the last  $p-k$  diagonal entries. Observe that the first  $k$  entries of the product  $(\hat{\boldsymbol{\Sigma}}_k + cV_n\mathbf{I})^{-1} \times (\boldsymbol{\Sigma} + cV_n\mathbf{I})$  are equal to 1, while the last  $p-k$  entries are equal to  $(\mu_j + cV_n)/cV_n$ . Thus, we have that

$$\|\mathbf{I} - \hat{\mathbf{H}}_{n,k}^{-1}\mathbf{H}_n\| = \left| \frac{\mu_{k+1}}{cV_n} \right|. \quad (23)$$

### 8.2 Proof of Lemma 5

To begin, recall the result from Lemma 4 in (18). From this, we use the following result from [25, Lemma 6], which present here as a lemma.

**Lemma 6** Consider the  $k$ -TAN step where  $\|\hat{\mathbf{H}}_{n,k}^{-1}\nabla R_n(\mathbf{x}_m) - \mathbf{H}_n^{-1}\nabla R_n(\mathbf{x}_m)\| \leq \epsilon_n \|\mathbf{H}_n^{-1}\nabla R_n(\mathbf{x}_m)\|$ . The Newton decrement of the  $k$ -TAN iterate  $\lambda_n(\mathbf{x}_n)$  is bounded by

$$\lambda_n(\mathbf{x}_n) \leq \frac{[(1 + \epsilon_n)\lambda_n(\mathbf{x}_m)^2 + \epsilon_n\lambda_n(\mathbf{x}_m)]}{(1 - (1 + \epsilon_n)\lambda_n(\mathbf{x}_m))^2} \quad w.h.p \quad (24)$$

Lemma 6 provides a bound on the Newton decrement of the iterate  $\mathbf{x}_n$  computed from the  $k$ -TAN update in (6) in terms of Newton decrement of the previous iterate  $\mathbf{x}_m$  and the error  $\epsilon_n$  incurred from the truncation of the Hessian. We proceed in a manner similar to [16, Proposition 4] by finding upper and lower bounds for the sub-optimality  $S_n(\mathbf{x}) = R_n(\mathbf{x}) - R_n(\mathbf{x}_n^*)$  in terms of the Newton decrement parameter  $\lambda_n(\mathbf{x})$ . Consider the result from [22, Theorem 4.1.11],

$$\begin{aligned} \lambda_n(\mathbf{x}) - \ln(1 + \lambda_n(\mathbf{x})) &\leq R_n(\mathbf{x}) - R_n(\mathbf{x}_n^*) \\ &\leq -\lambda_n(\mathbf{x}) - \ln(1 - \lambda_n(\mathbf{x})). \end{aligned} \quad (25)$$

Consider the Taylor's expansion of  $\ln(1 + a)$  for  $a = \lambda_n(\mathbf{x})$  to obtain the lower bound on  $\lambda_n(\mathbf{x})$ ,

$$\lambda_n(\mathbf{x}) \geq \ln(1 + \lambda_n(\mathbf{x})) + \frac{1}{2}\lambda_n(\mathbf{x})^2 - \frac{1}{3}\lambda_n(\mathbf{x})^3. \quad (26)$$

Assume that  $\mathbf{x}$  is such that  $0 < \lambda_n(\mathbf{x}) < 1/4$ . Then the expression in (26) can be rearranged and bounded as

$$\frac{1}{6}\lambda_n(\mathbf{x})^2 \leq \frac{1}{2}\lambda_n(\mathbf{x})^2 - \frac{1}{3}\lambda_n(\mathbf{x})^3 \quad (27)$$

Now, consider the Taylor's expansion of  $\ln(1 - a)$  for  $a = \lambda_n(\mathbf{x})$  in a similar manner to obtain for  $\lambda_n(\mathbf{x}) < 1/4$ , from [5, Chapter 9.6.3].

$$-\lambda_n(\mathbf{x}) - \ln(1 - \lambda_n(\mathbf{x})) \leq \lambda_n(\mathbf{x})^2 \quad (28)$$

Using these bounds with the inequalities in (25) we obtain the upper and lower bounds on  $S_n(\mathbf{x})$  as

$$\frac{1}{6}\lambda_n(\mathbf{x})^2 \leq S_n(\mathbf{x}) \leq \lambda_n(\mathbf{x})^2. \quad (29)$$

Now, consider the bound for Newton decrement of the  $k$ -TAN iterate  $\lambda_n(\mathbf{x}_n)$  from (24). As we assume that  $\lambda_n(\mathbf{x}_m) < 1/4$ , we have

$$\lambda_n(\mathbf{x}_n) \leq \frac{4}{(3 - \epsilon_n)^2} [(1 + \epsilon_n)\lambda_n(\mathbf{x}_m)^2 + \lambda_n(\mathbf{x}_m)\epsilon_n]. \quad (30)$$

We substitute this back into the upper bound in (29) for  $\mathbf{x} = \mathbf{x}_n$  to obtain

$$S_n(\mathbf{x}_n) \leq \lambda_n(\mathbf{x}_n)^2 \quad (31)$$

$$\begin{aligned} &\leq \frac{16}{(3 - \epsilon_n)^4} [(1 + \epsilon_n)\lambda_n(\mathbf{x}_m)^2 + \lambda_n(\mathbf{x}_m)\epsilon_n]^2 \\ &= \frac{16}{(3 - \epsilon_n)^4} [(1 + \epsilon_n)^2\lambda_n(\mathbf{x}_m)^4 \\ &\quad + 2\epsilon_n(1 + \epsilon_n)\lambda_n(\mathbf{x}_m)^3 + \epsilon_n^2\lambda_n(\mathbf{x}_m)^2]. \end{aligned} \quad (32)$$

Consider also from (29) that we can upper bound the Newton decrement as  $\lambda(\mathbf{x}_m)^2 \leq 6S_n(\mathbf{x}_m)$ . We plug this back into (32) to obtain a final bound for sub-optimality as

$$\begin{aligned} S_n(\mathbf{x}_n) &\leq \frac{16}{(3 - \epsilon_n)^4} [36(1 + \epsilon_n)^2 S_n(\mathbf{x}_m)^2 \\ &\quad + 30\epsilon_n(1 + \epsilon_n) S_n(\mathbf{x}_m)^{3/2} + 6\epsilon_n^2 S_n(\mathbf{x}_m)]. \end{aligned} \quad (33)$$

### 8.3 Additional Experiments

In Figure 5, we show results on the BIO dataset used for protein homology classification in KDD Cup 2004. The dimensions are  $N = 145751$  and  $p = 74$ . In this setting, the number of samples is very large but the problem dimension is very small. Observe in Figure 5 that both  $k$ -TAN and AdaNewton greatly outperform the first order methods, due to the reduced cost in Hessian computation that comes from adaptive sample size. However, because  $p$  is small, the additional gain from the truncating in the inverse in  $k$ -TAN does not provide significant benefit relative to AdaNewton.

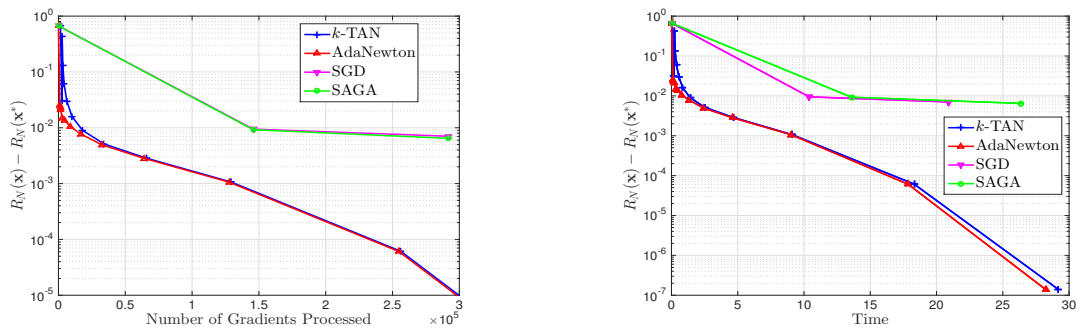

Figure 5: Convergence of  $k$ -TAN, AdaNewton, SGD, and SAGA in terms of number of processed gradients (left) and runtime (right) for the BIO protein homology classification problem.
